# Supplementary material for: Evidence of the effectiveness of Resveratrol in the prevention of guanine one-electron oxidation: possible benefits in cancer prevention
Source: Royal Society of Chemistry journal article supplement (doi:10.1039/c9cp03027a), 2019-01-01
Supplement: c9cp03027a1.pdf [file c9cp03027a1.pdf]

### Supplementary Material

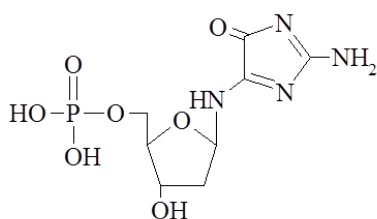

Imidazolone 5'-monophosphate (dIzMP)

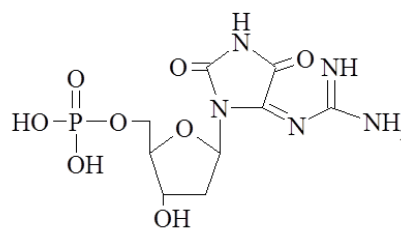

Dehydroguanosine 5'-monophosphate (dDGhMP)

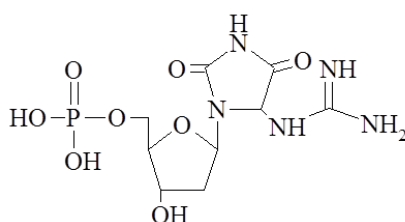

Guanidinohydantoin 5'-monophosphate (dGhMP)

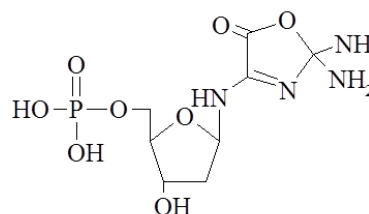

Oxazolone 5'-monophosphate (dZMP)

**Figure S1: Chemical structure of photosensitized oxidation products of dGMP**

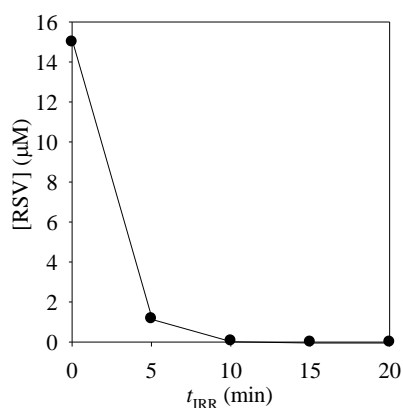

**Figure S2: Time evolution of RSV during Ptr-photosensitized oxidation in air-equilibrated aqueous solutions (pH 6.0) as a function of irradiation time.  $\lambda_{\text{IRR}} = 365 \text{ nm}$ ,  $[\text{Ptr}]_0 = 60 \text{ }\mu\text{M}$ ,  $[\text{RSV}]_0 = 5 \text{ }\mu\text{M}$ .**

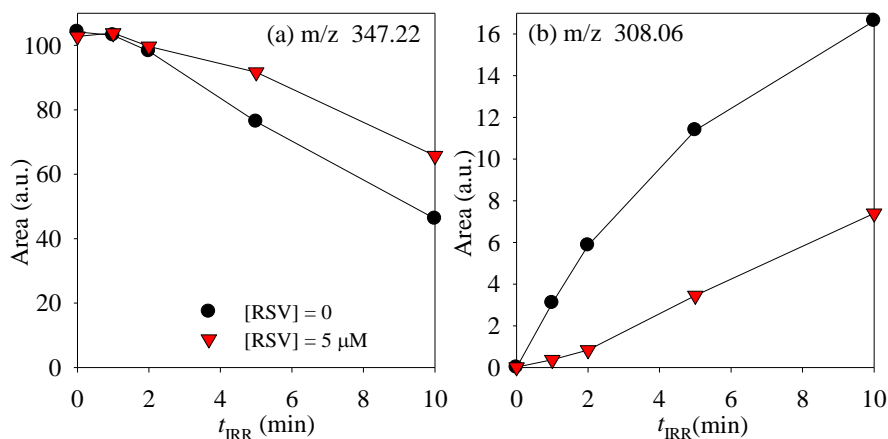

**Figure S3: UPLC-QToF-MS analysis of irradiated air-equilibrated solutions containing dGMP (100  $\mu\text{M}$ ) and Ptr (100  $\mu\text{M}$ ). Area of the peak corresponding to (a) dGMP and (b) dIzMP, extracted from mass chromatograms recorded for the corresponding specific masses. Experiments performed in the absence of RSV (●) and in the presence of 5  $\mu\text{M}$  RSV (▼).**

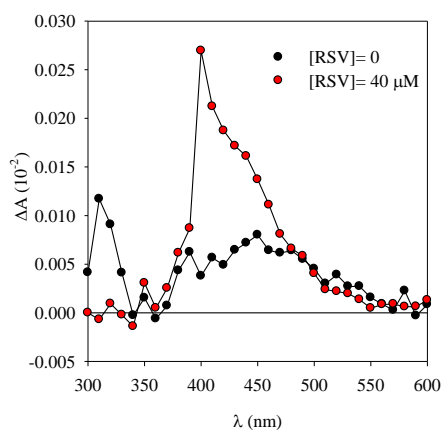

**Figure S4: (a) Differential transient absorption spectra recorded 64  $\mu\text{s}$  after the 355 nm laser pulse of Ar-saturated aqueous solutions containing Ptr (93  $\mu\text{M}$ ) and dGMP (700  $\mu\text{M}$ ) in the absence and in the presence of RSV (0 and 40  $\mu\text{M}$ ).**

| Reaction                       |                                                                    | Rate                                                 |
|--------------------------------|--------------------------------------------------------------------|------------------------------------------------------|
| $^3\text{Ptr}^*$               | $\longrightarrow$ Ptr                                              | $1/\tau_T [^3\text{Ptr}^*]$                          |
| $^3\text{Ptr}^* + \text{dGMP}$ | $\longrightarrow$ $\text{Ptr}^{\bullet-} + \text{dGMP}^{\bullet+}$ | $k_{qT}^{\text{dGMP}} [^3\text{Ptr}^*][\text{dGMP}]$ |
| $^3\text{Ptr}^* + \text{RSV}$  | $\longrightarrow$ $\text{Ptr}^{\bullet-} + \text{RSV}^{\bullet+}$  | $k_{qT}^{\text{RSV}} [^3\text{Ptr}^*][\text{RSV}]$   |
| $^3\text{Ptr}^* + \text{O}_2$  | $\longrightarrow$ Ptr + $^1\text{O}_2$                             | $k_{qT}^{\text{O}_2} [^3\text{Ptr}^*][\text{O}_2]$   |

**Scheme S1: Reactions involving  $^3\text{Ptr}^*$ .  $\tau_T = 6.2(\pm 0.7) \mu\text{s}$ ,  $k_{qT}^{\text{dGMP}} = 5.9 \times 10^9 \text{M}^{-1}\text{s}^{-1}$ ,  $k_{qT}^{\text{RSV}} = 1.6 \times 10^9 \text{M}^{-1}\text{s}^{-1}$  and  $k_{qT}^{\text{O}_2} = 4.94 \times 10^9 \text{M}^{-1}\text{s}^{-1}$ .<sup>31</sup>**
